# Supplementary material for: Deep extractive and catalytic oxidative desulfurization of liquid fuels by using iron(iii) based dication ionic liquids
Source: Royal Society of Chemistry journal article supplement (doi:10.1039/d3nj02179c), 2023-01-01
Supplement: d3nj02179c1.pdf [file d3nj02179c1.pdf]

## Supplementary Information

### Deep extractive and catalytic oxidative desulfurization of liquid fuels by using iron(III) based dication ionic liquids

Anham Zafar<sup>ab</sup>, Imtiaz-ud-Din<sup>a</sup>, Saadia Batool<sup>a</sup>, Robert G. Palgrave<sup>b</sup>, Sammer Yousuf<sup>c</sup>,

- a. Department of Chemistry, Quaid-i-Azam University, Islamabad 45320, Pakistan
- b. Chemistry Department, University College London, 20 Gordon Street, London, WC1E 0AJ, UK
- c. H.E.J. Research Institute of Chemistry, International Center for Chemical and Biological Sciences, University of Karachi, Karachi-75270, Pakistan

#### Table of Contents

|                                                            |           |
|------------------------------------------------------------|-----------|
| <b>NMR Spectrometry(I<sub>1</sub>-I<sub>5</sub>)</b> ..... | <b>2</b>  |
| <b>Mass Spectrometry (1-5)</b> .....                       | <b>7</b>  |
| <b>Raman spectroscopy (1-5)</b> .....                      | <b>9</b>  |
| <b>X-ray photoelectron spectroscopy (1-5)</b> .....        | <b>10</b> |

# NMR Spectrometry (1-5)

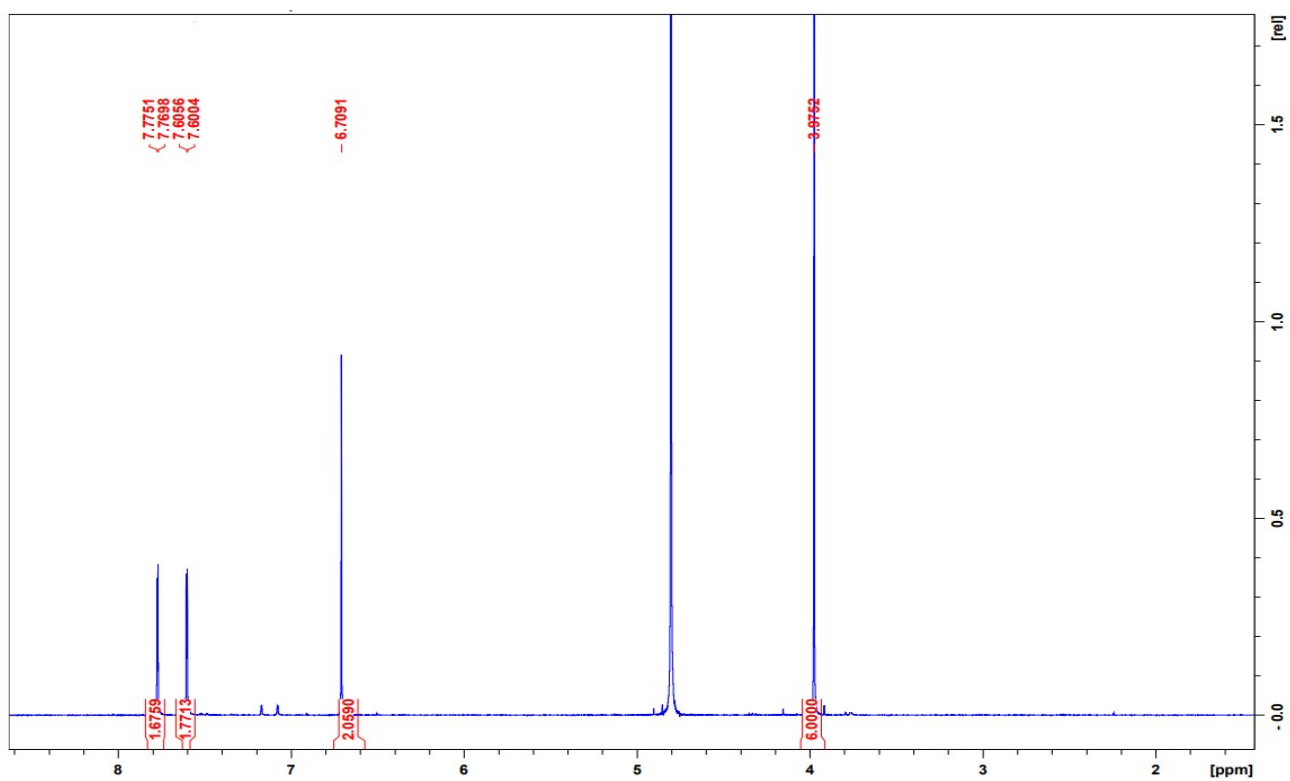

Fig.S1.  $^1\text{H}$  NMR spectrum for **I**<sub>1</sub>

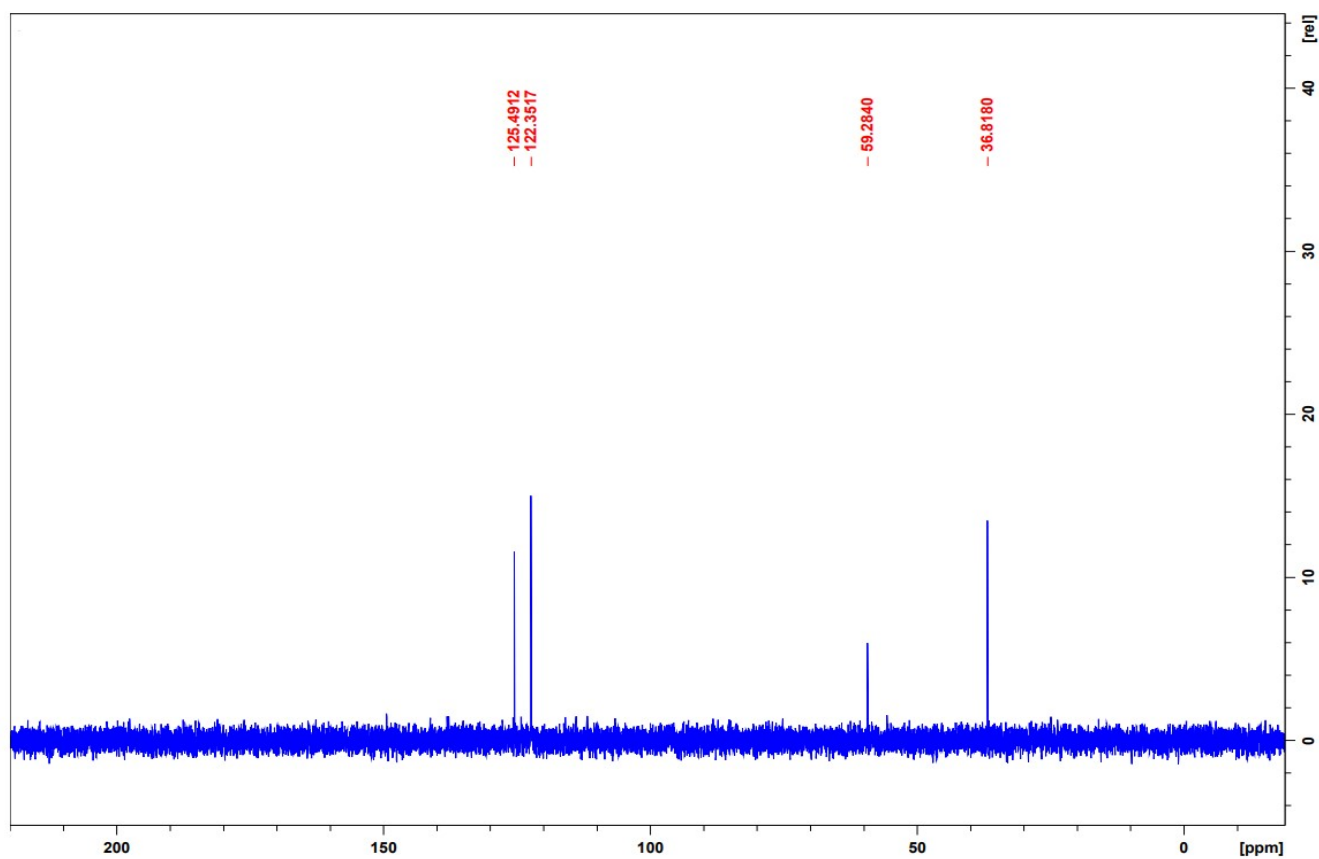

Fig.S2.  $^{13}\text{C}$  NMR spectrum for **I**<sub>1</sub>

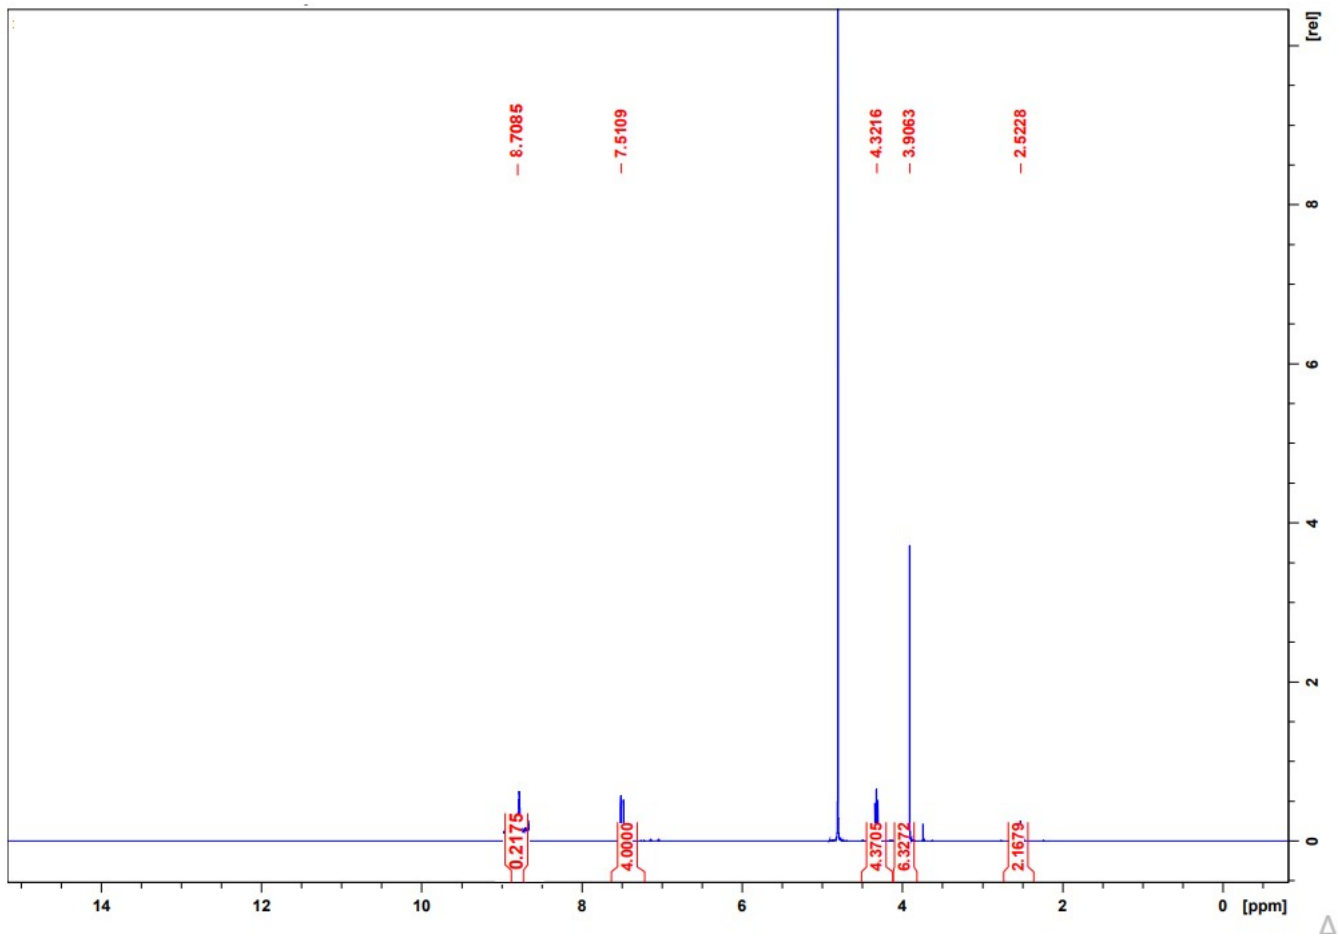

Fig.S3. <sup>1</sup>H NMR spectrum for I<sub>2</sub>

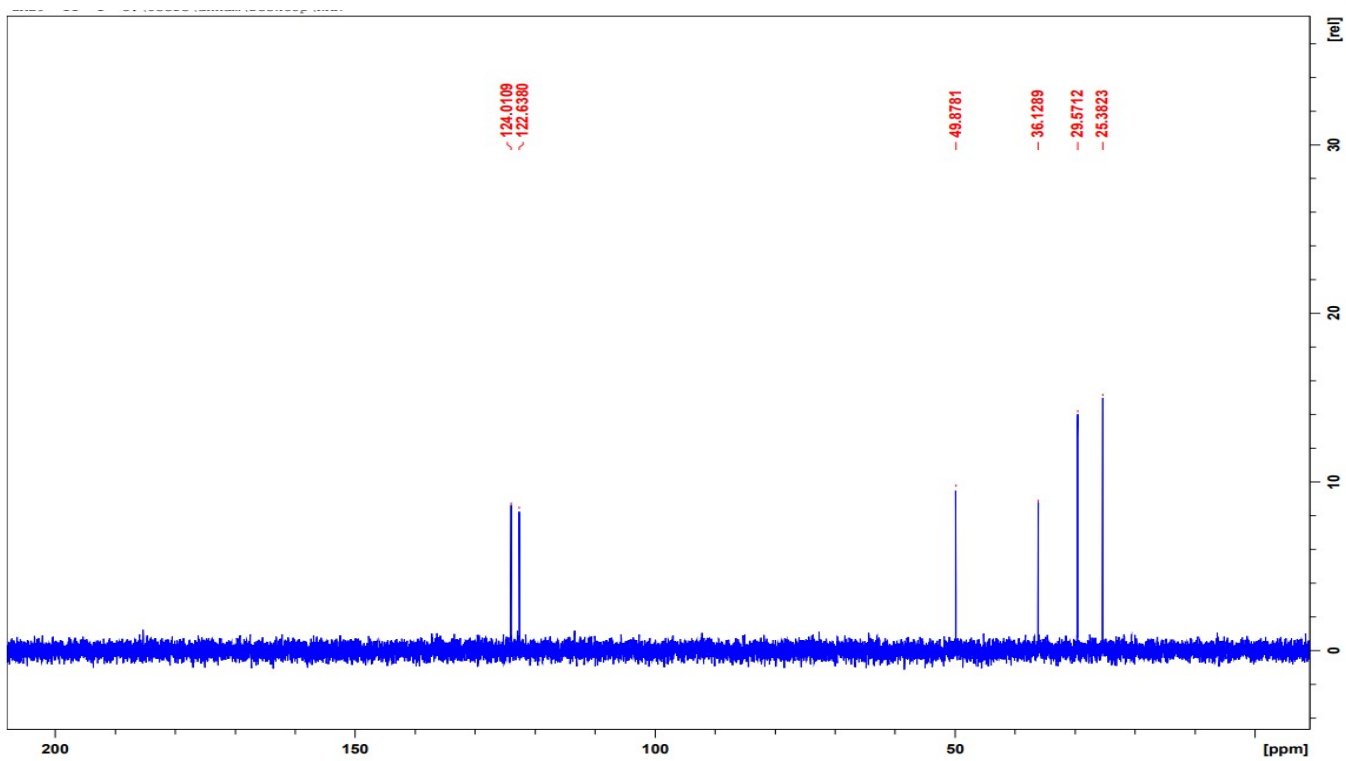

Fig.S4. <sup>13</sup>C NMR spectrum for I<sub>2</sub>

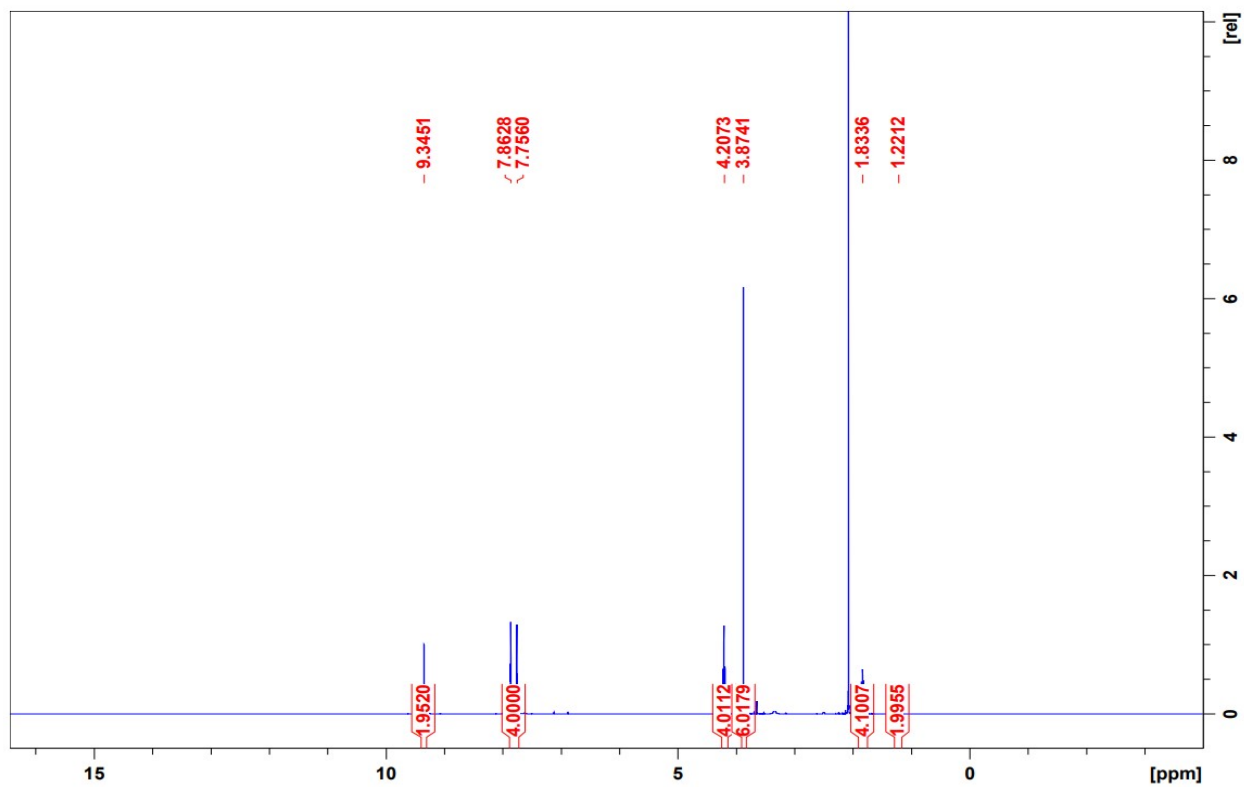

Fig.S5. <sup>1</sup>H NMR spectrum for I<sub>3</sub>

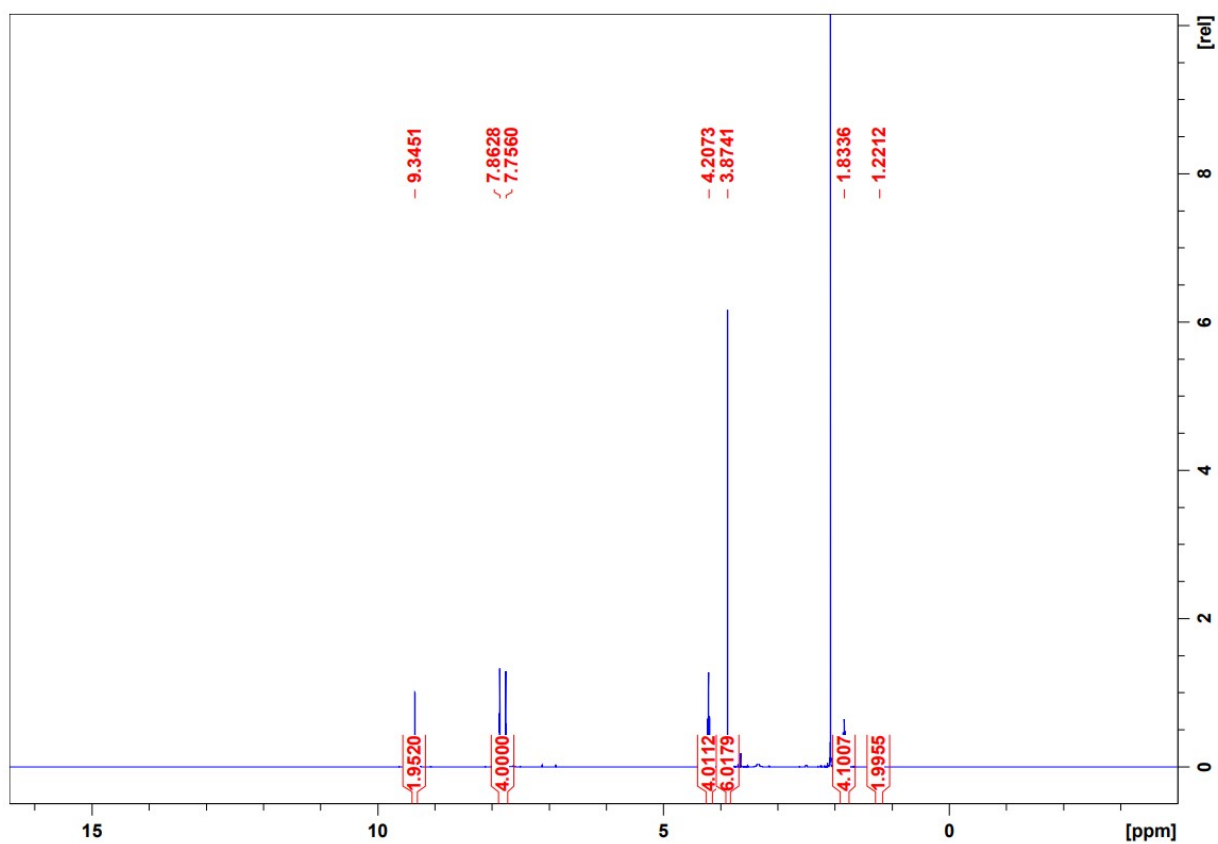

Fig.S6. <sup>13</sup>C NMR spectrum for I<sub>3</sub>

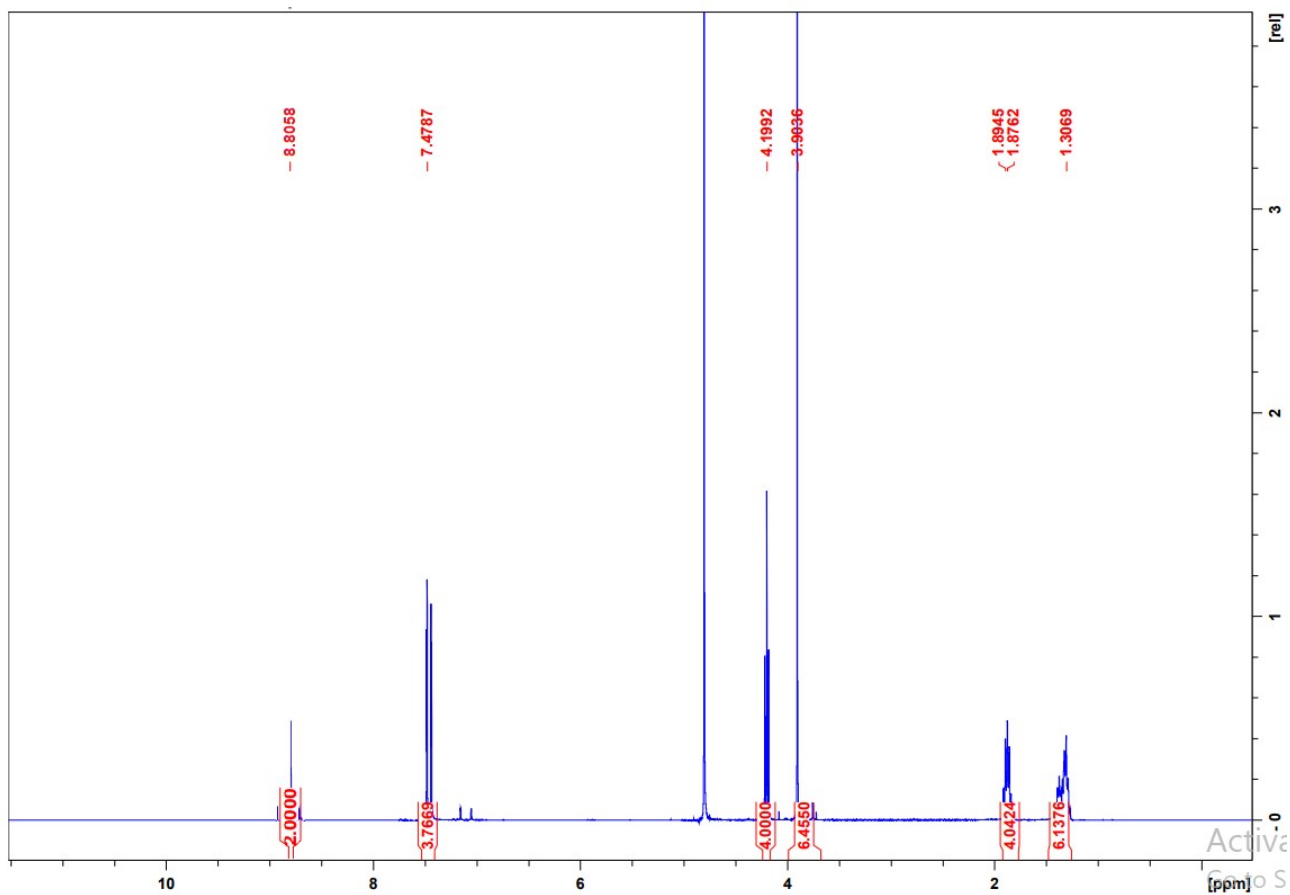

Fig.S7.  $^1\text{H}$  NMR spectrum for  $\text{I}_4$

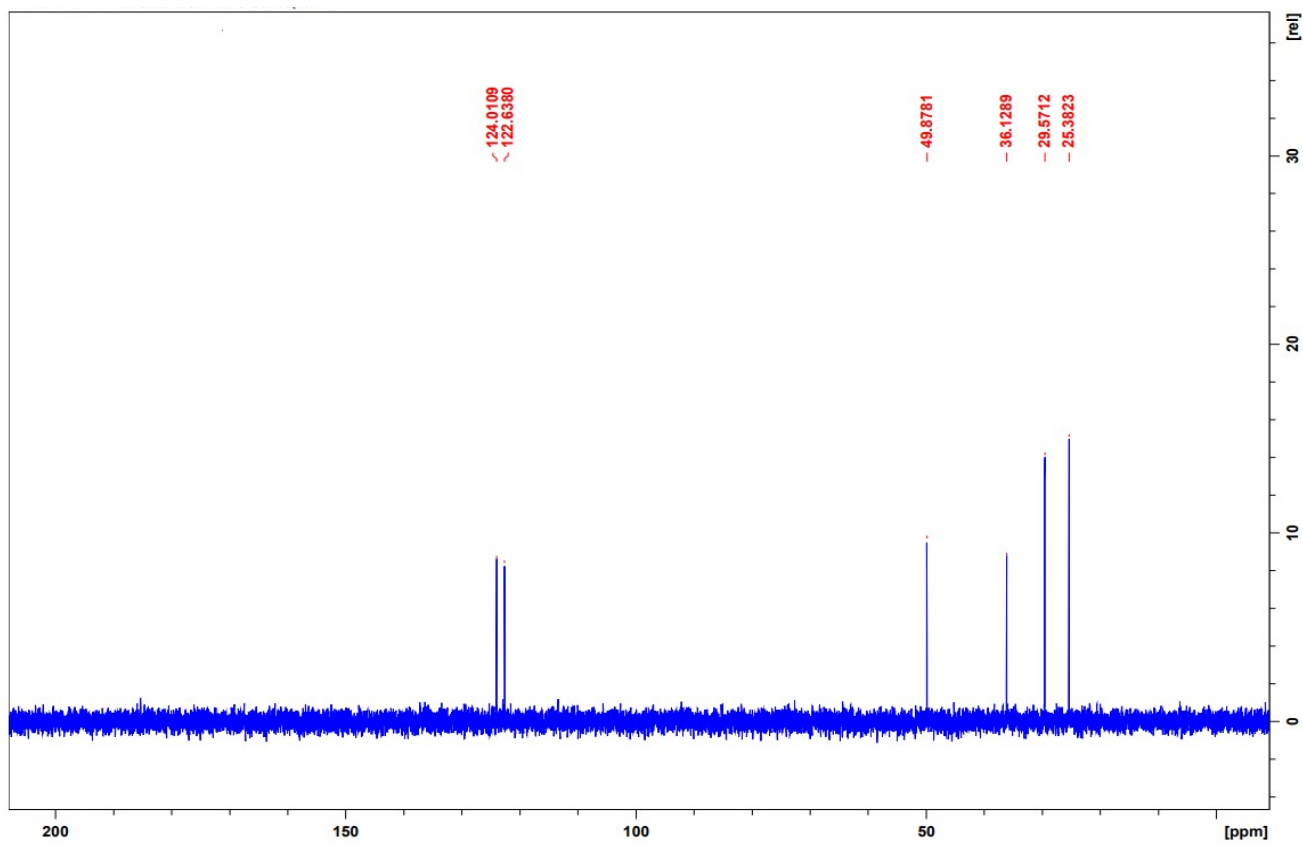

Fig.S8.  $^{13}\text{C}$  NMR spectrum for  $\text{I}_4$

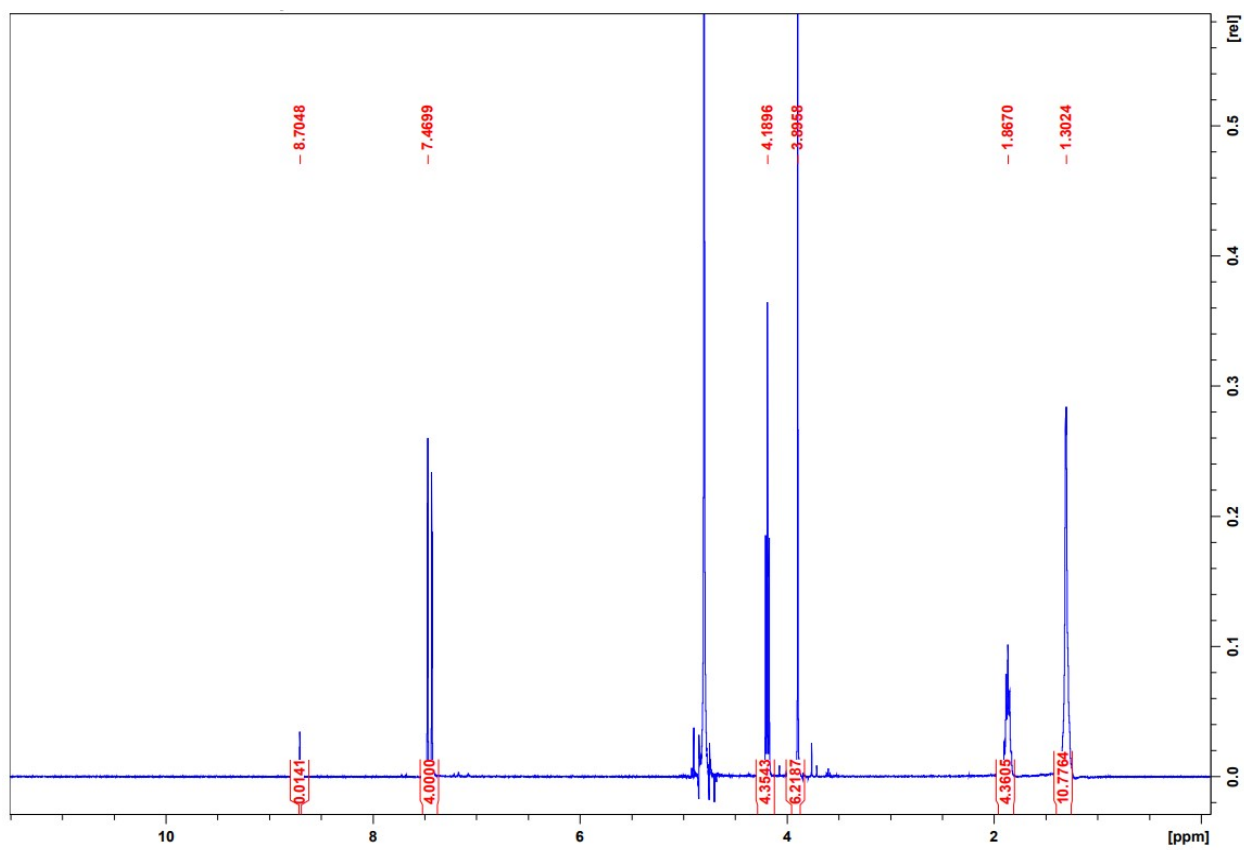

Fig.S9. <sup>1</sup>H NMR spectrum for I<sub>5</sub>

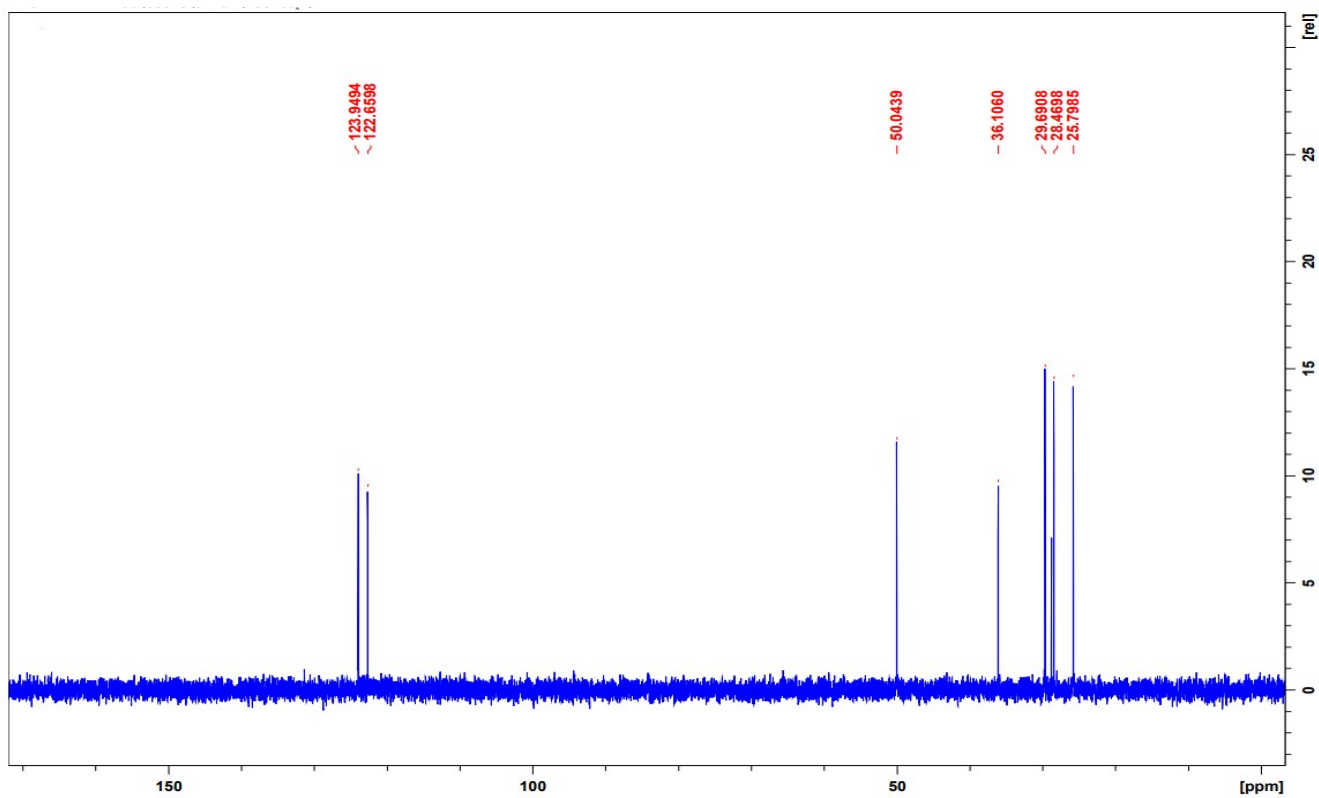

Fig.S10. <sup>13</sup>C NMR spectrum for I<sub>5</sub>

## Mass Spectrometry (1-5)

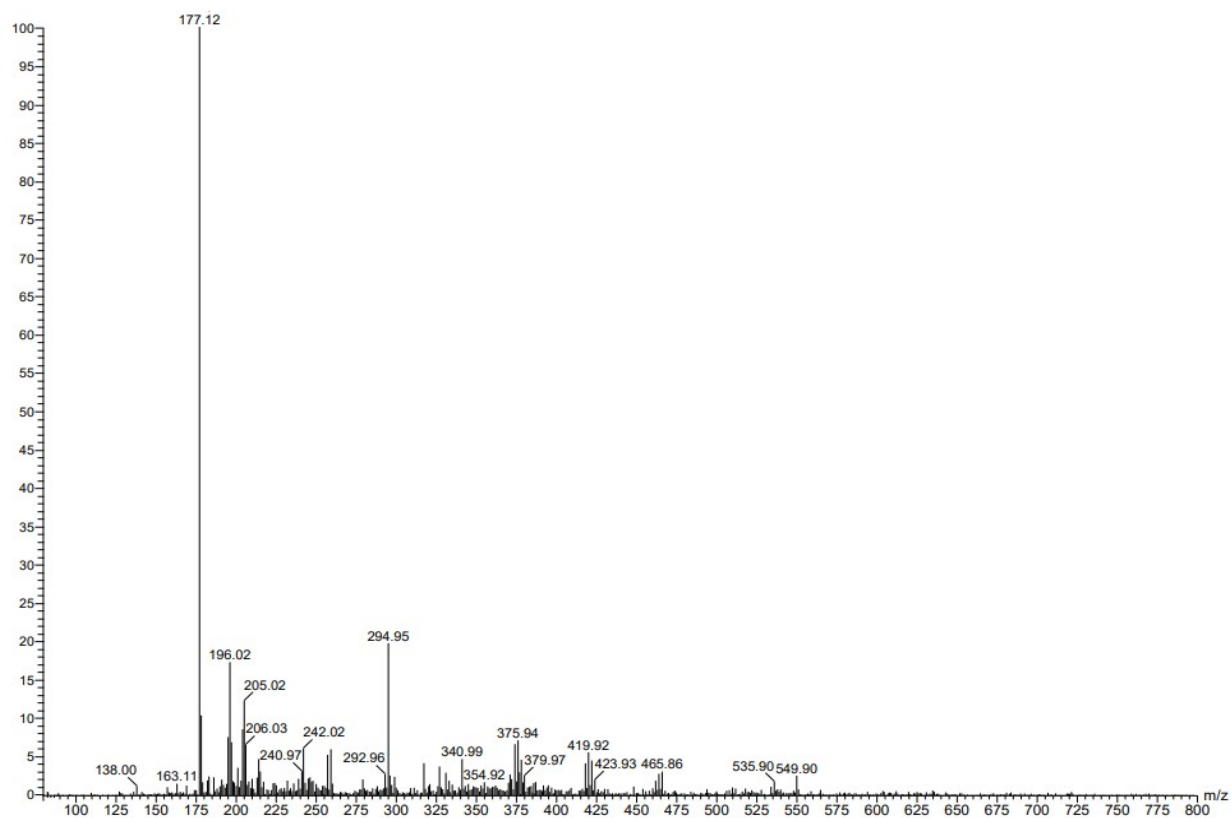

Fig.S11. ESI<sup>+</sup> mass spectrum for (1)

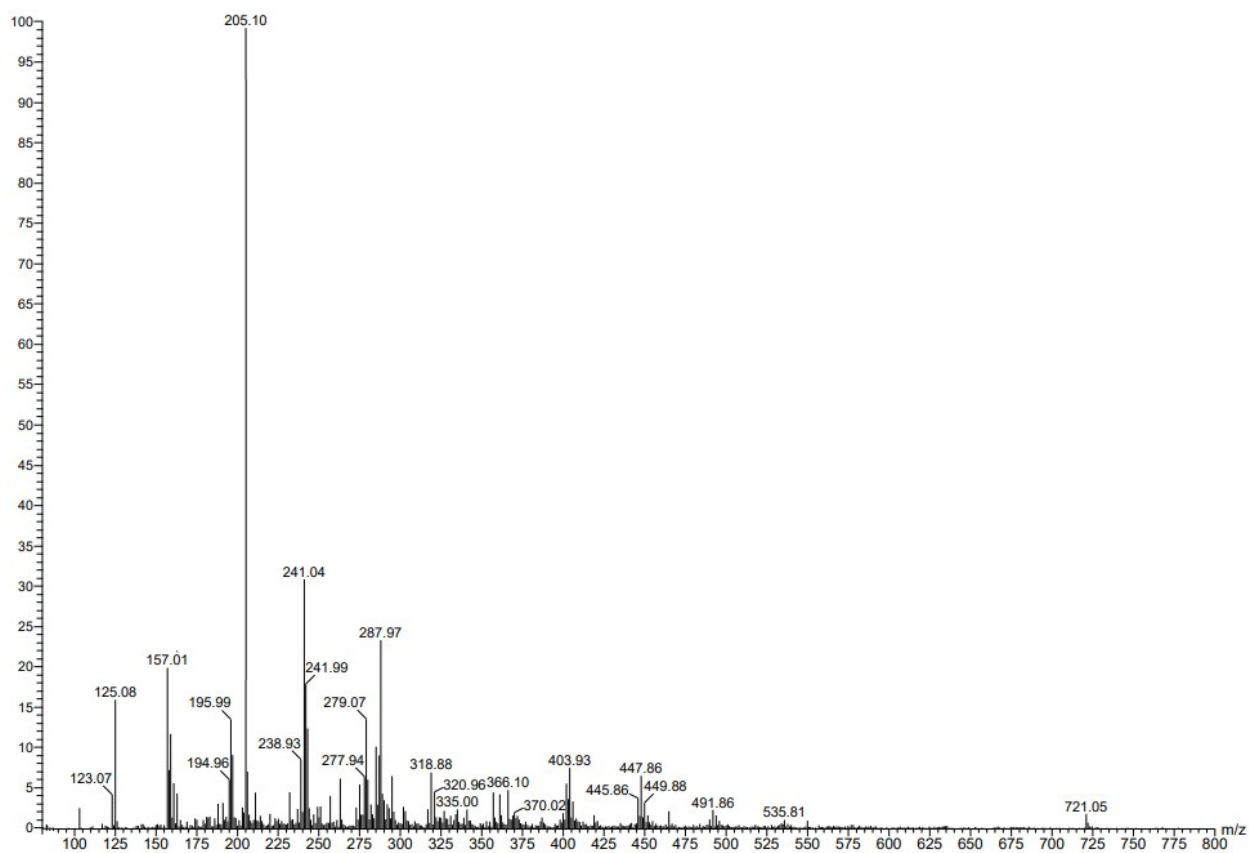

Fig.S12. ESI<sup>+</sup> mass spectrum for (2)

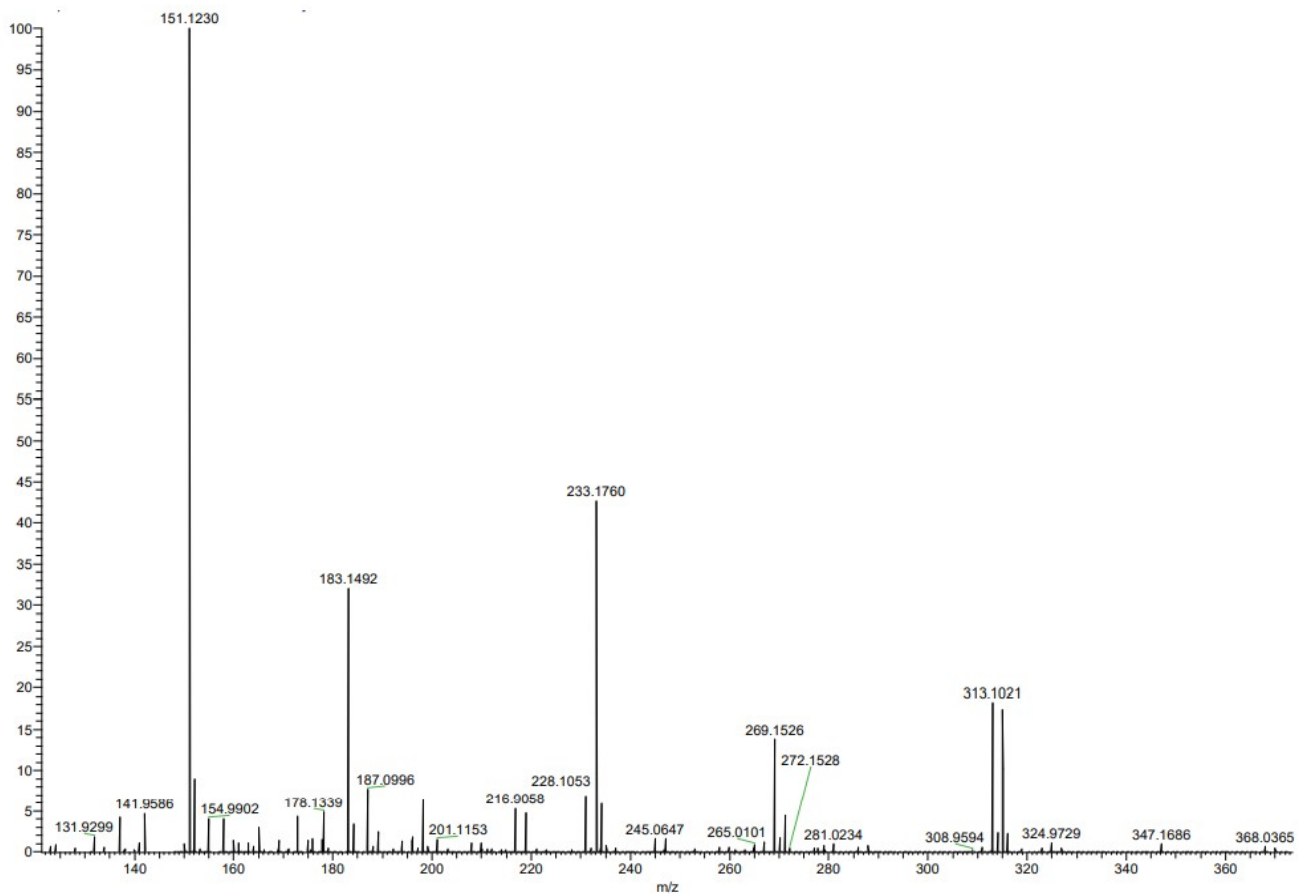

**Fig.S13.** ESI<sup>+</sup> mass spectrum for (3)

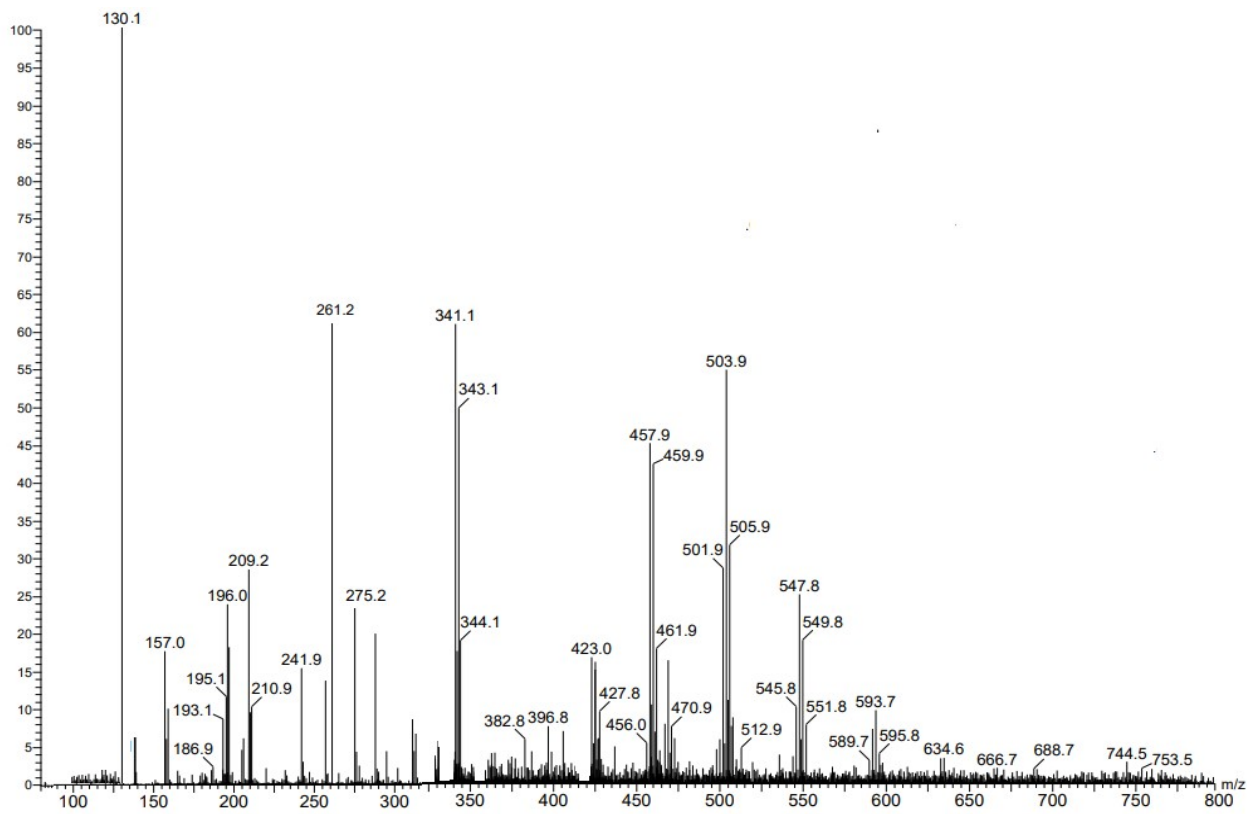

**Fig.S14.** ESI<sup>+</sup> mass spectrum for (4)



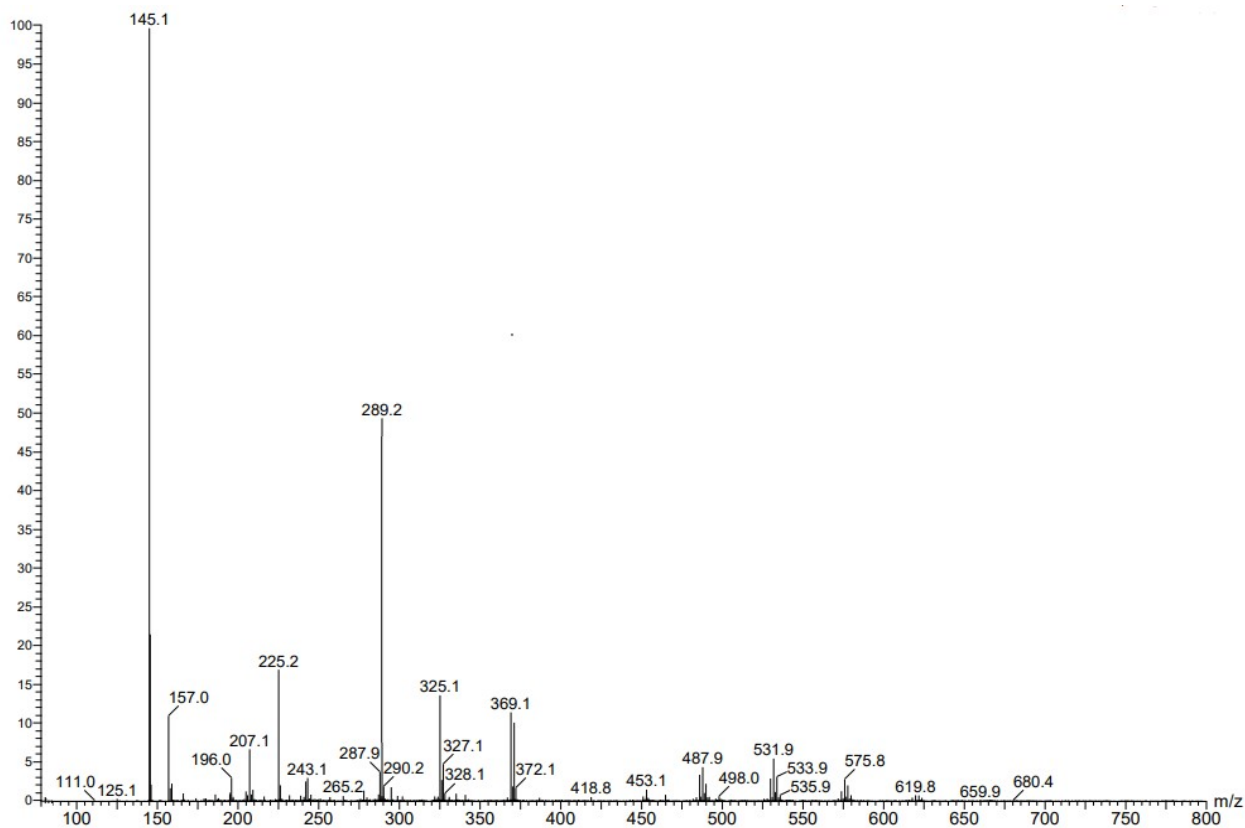

**Fig.S15.** ESI<sup>+</sup> mass spectrum for (5)

**Raman spectroscopy (1-5)**

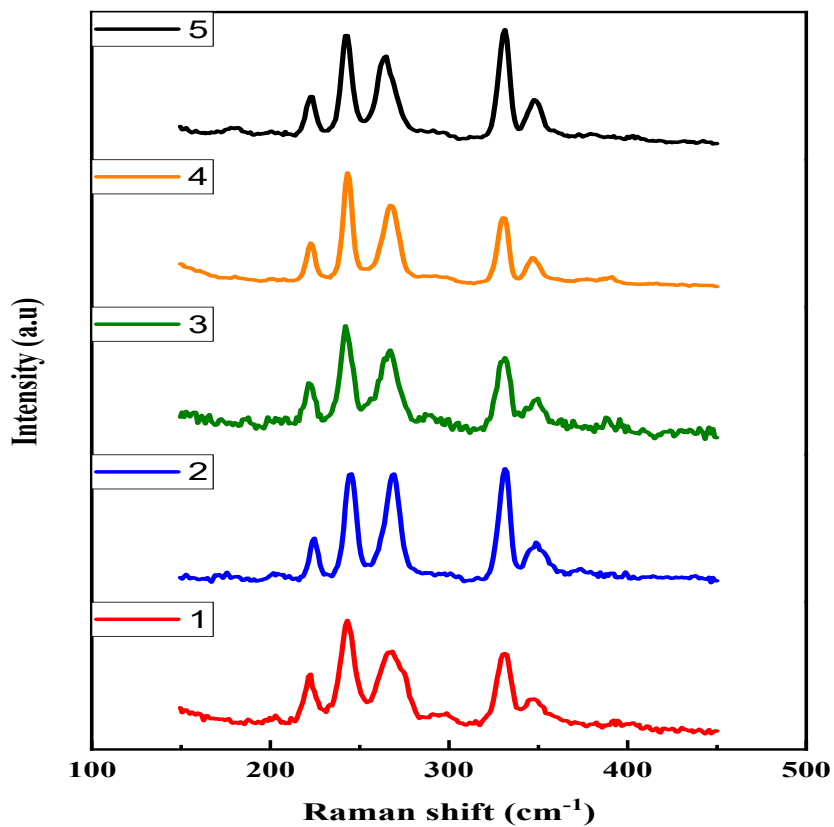

**Fig.S16.** Raman Spectra of DcILs (1-5)

### X-ray photoelectron spectroscopy (1-5)

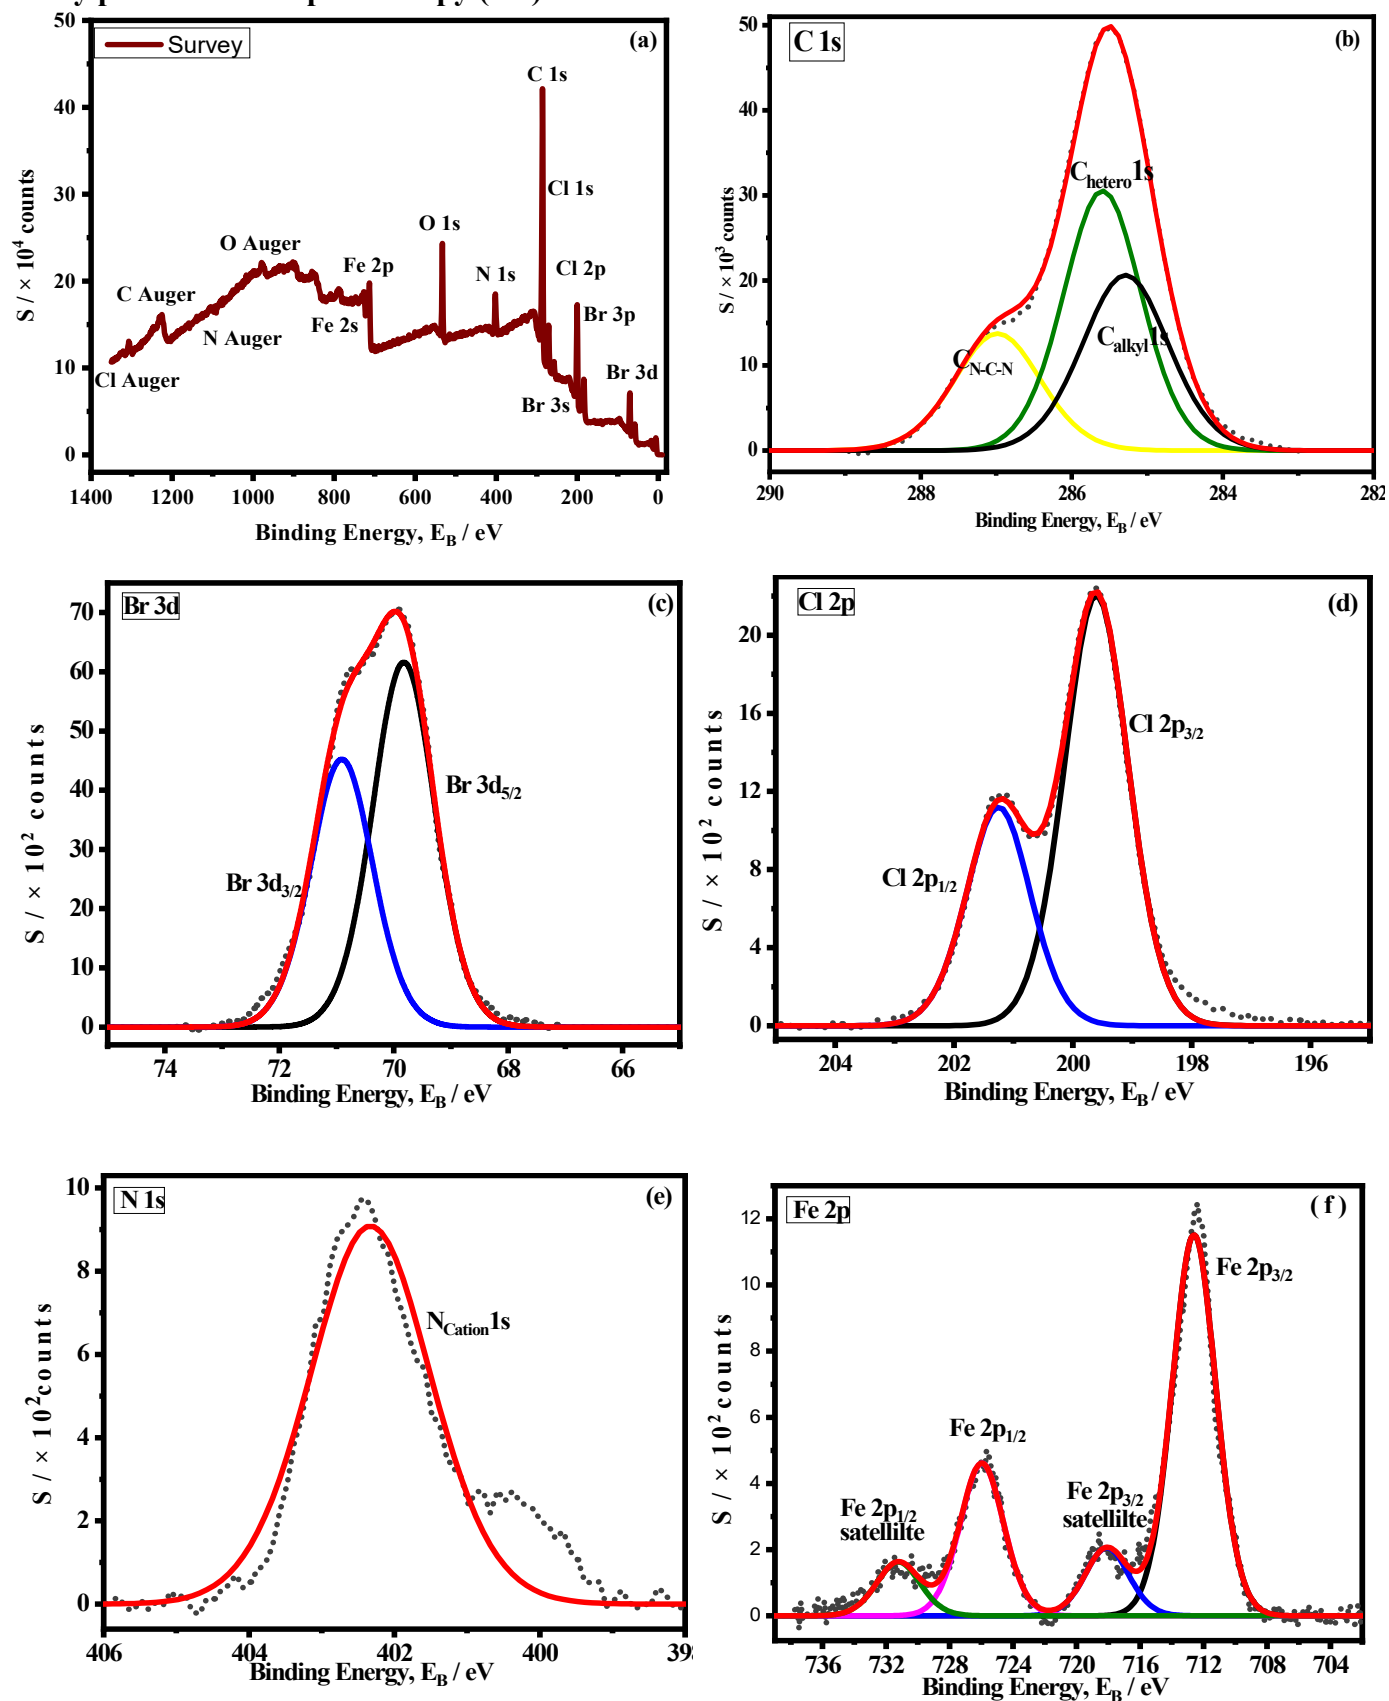

**Fig.S17.** High resolution XP spectra of **1** showing (a) full survey spectra, (b) peak fitted C 1s with structural assignment, (c) Br 3d, (d) Cl 2p, (e) N 1s and (f) Fe 2p

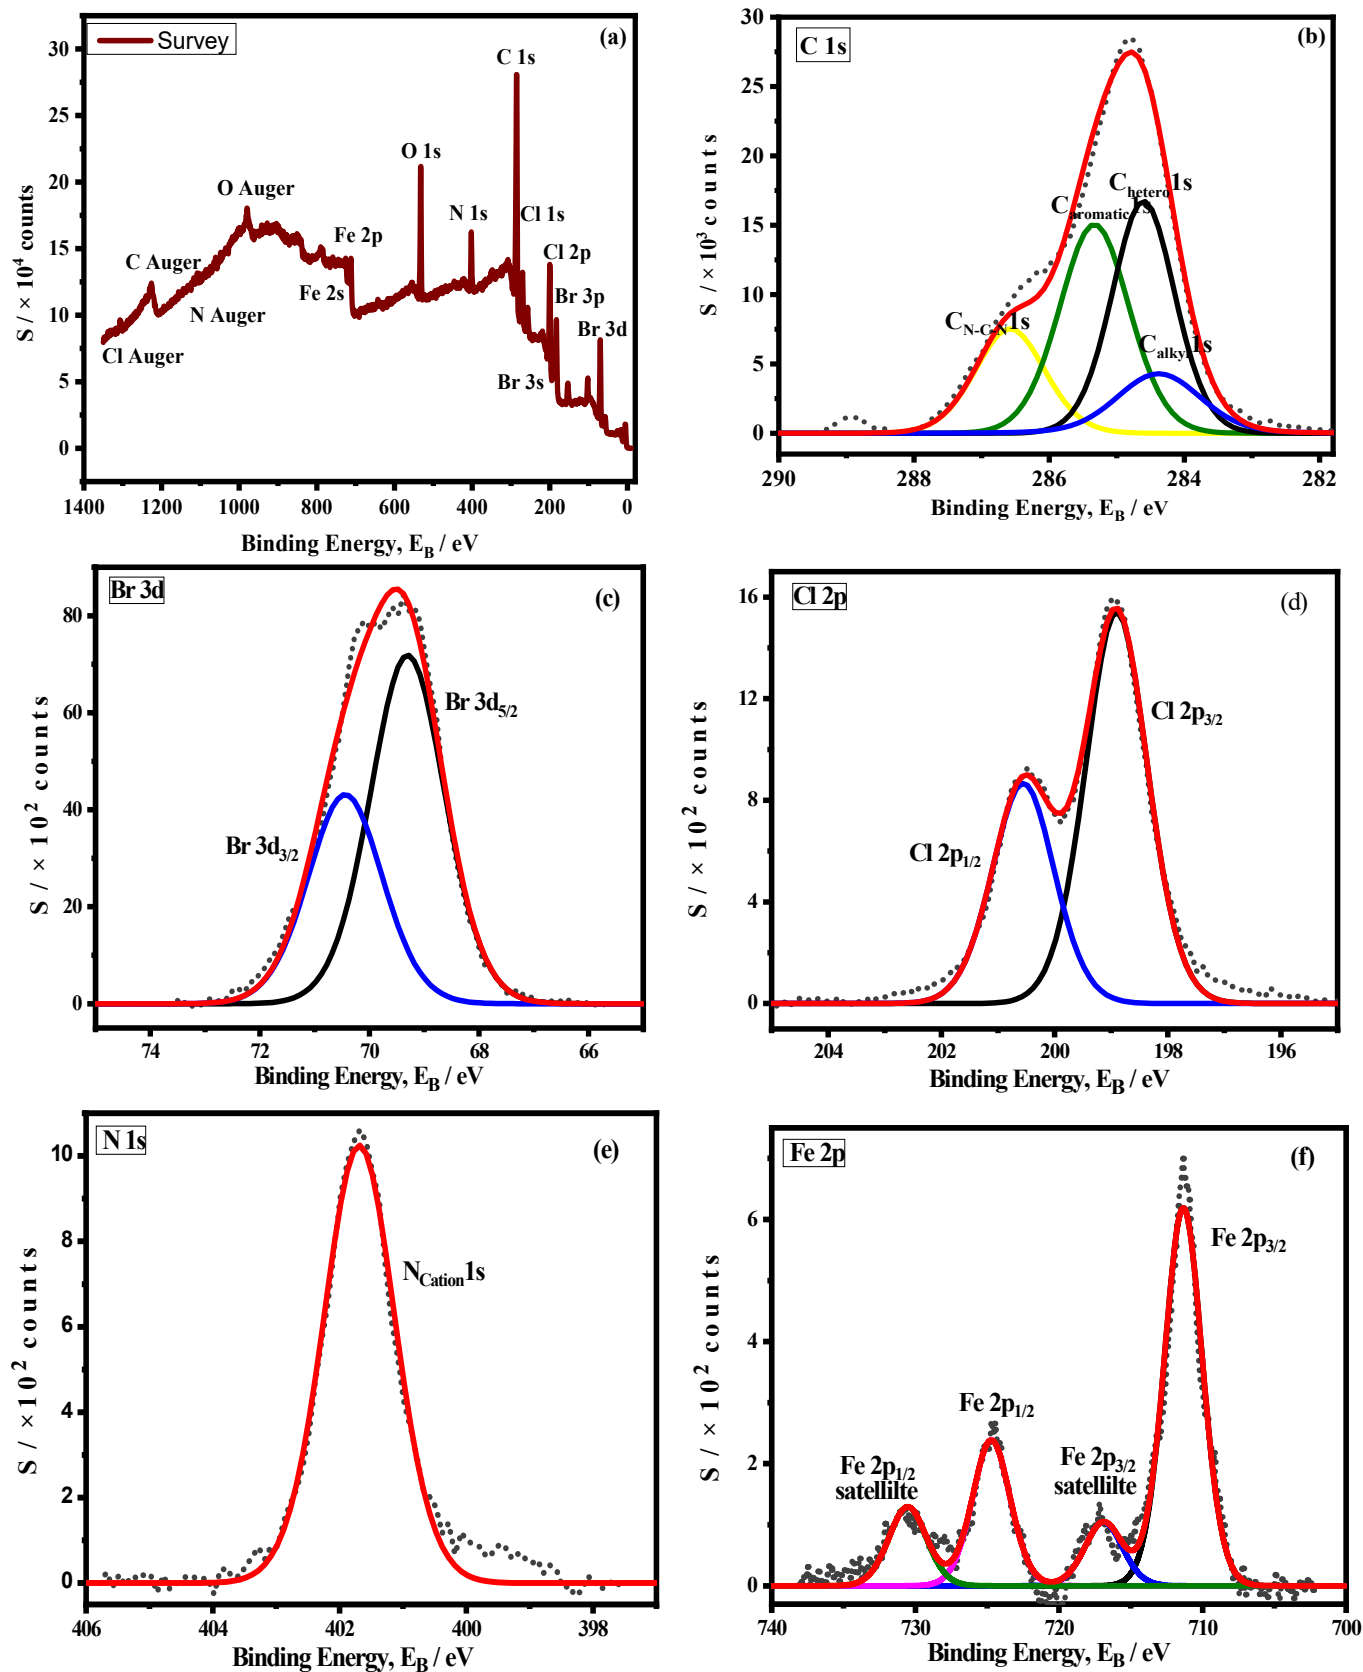

**Fig.S18.** High resolution XP spectra of (2) showing (a) full survey spectra, (b) peak fitted C 1s with structural assignment, (c) Br 3d, (d) Cl 2p, (e) N 1s and (f) Fe 2p

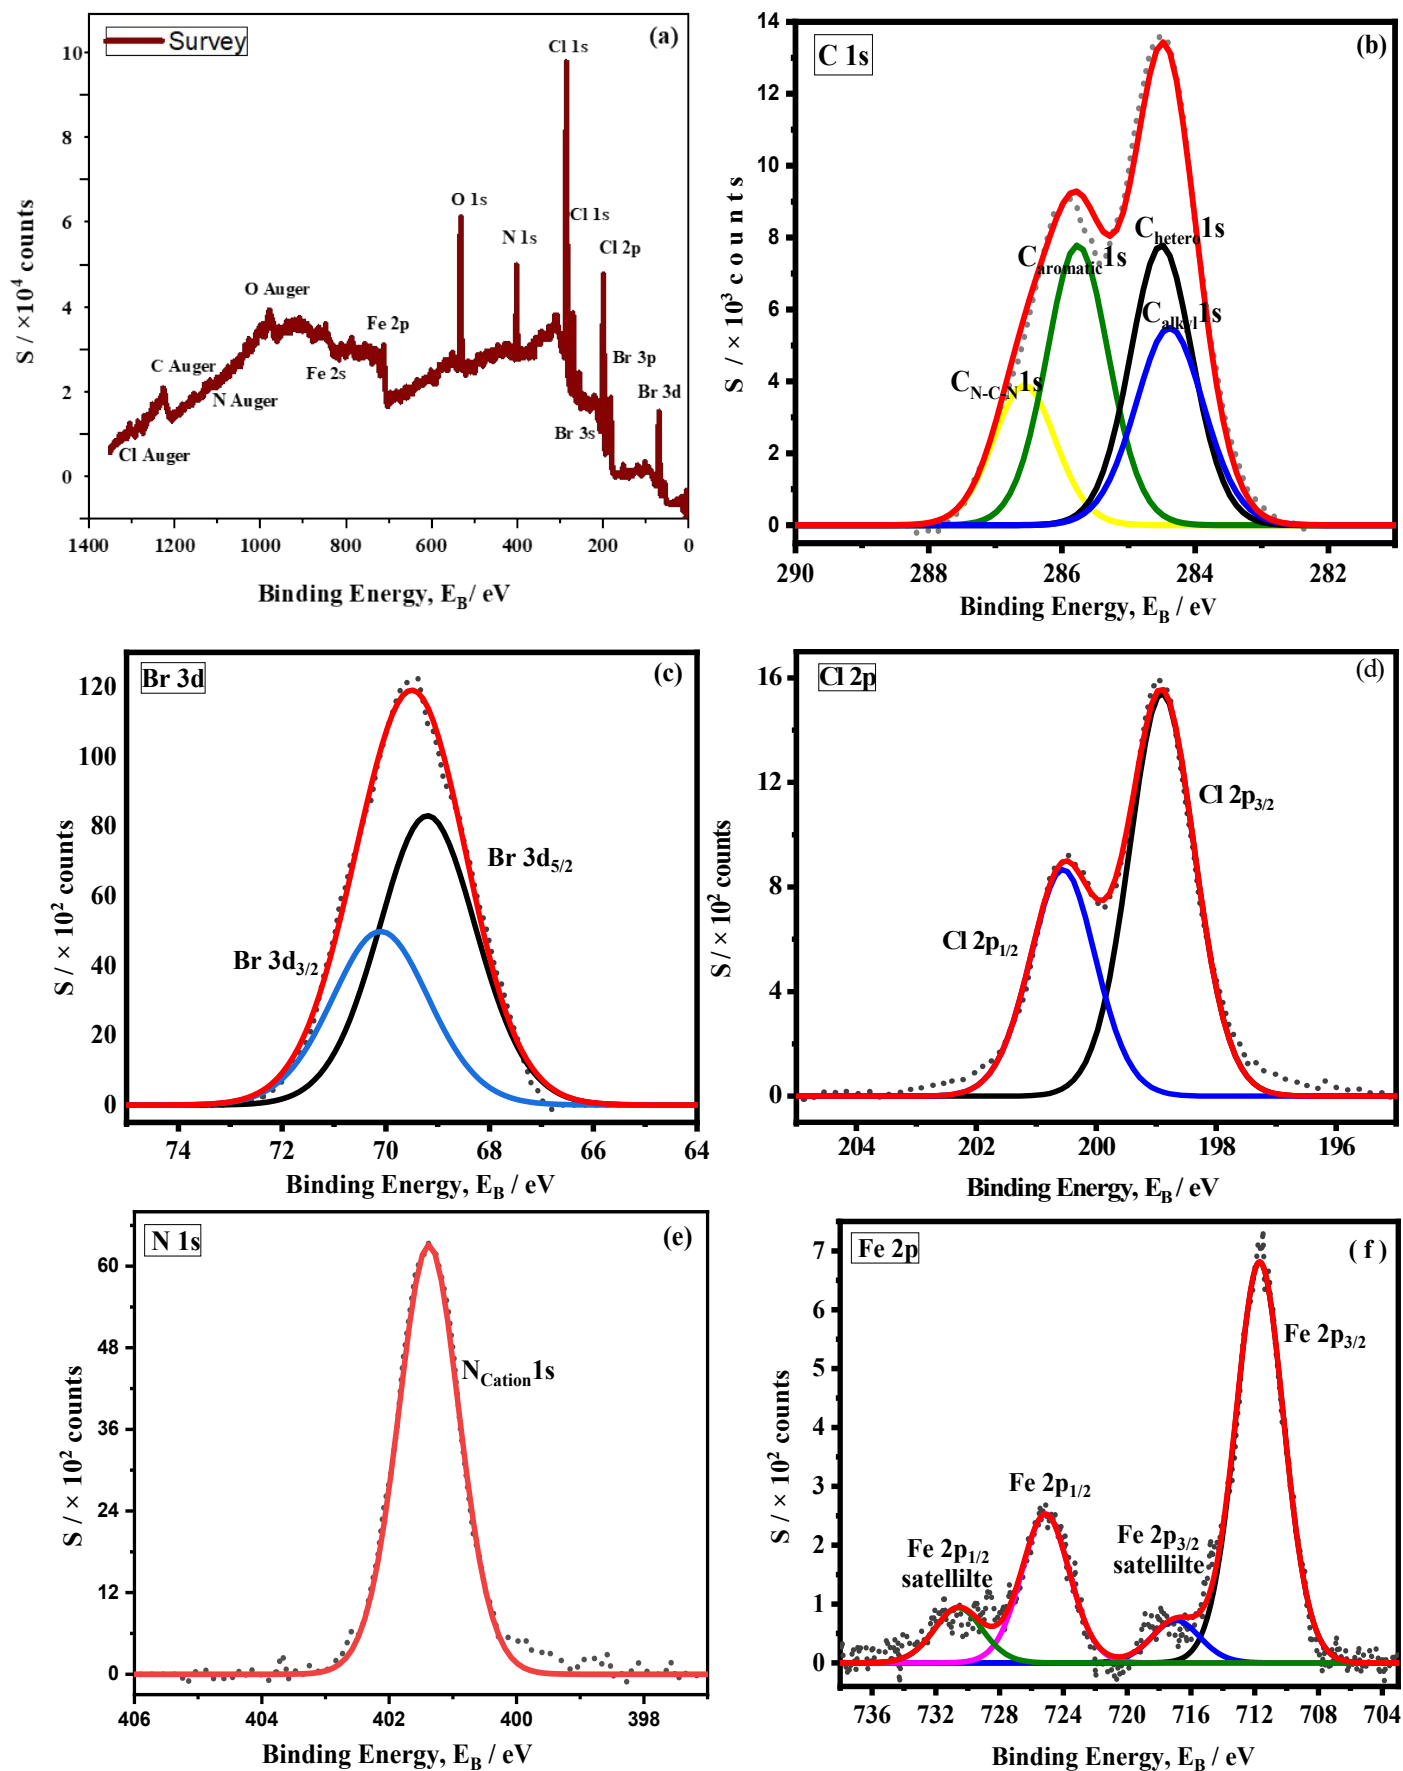

**Fig.S19.** High resolution XPS spectra of (3) showing (a) full survey spectra, (b) peak fitted C 1s with structural assignment, (c) Br 3d, (d) Cl 2p, (e) N 1s and (f) Fe 2p

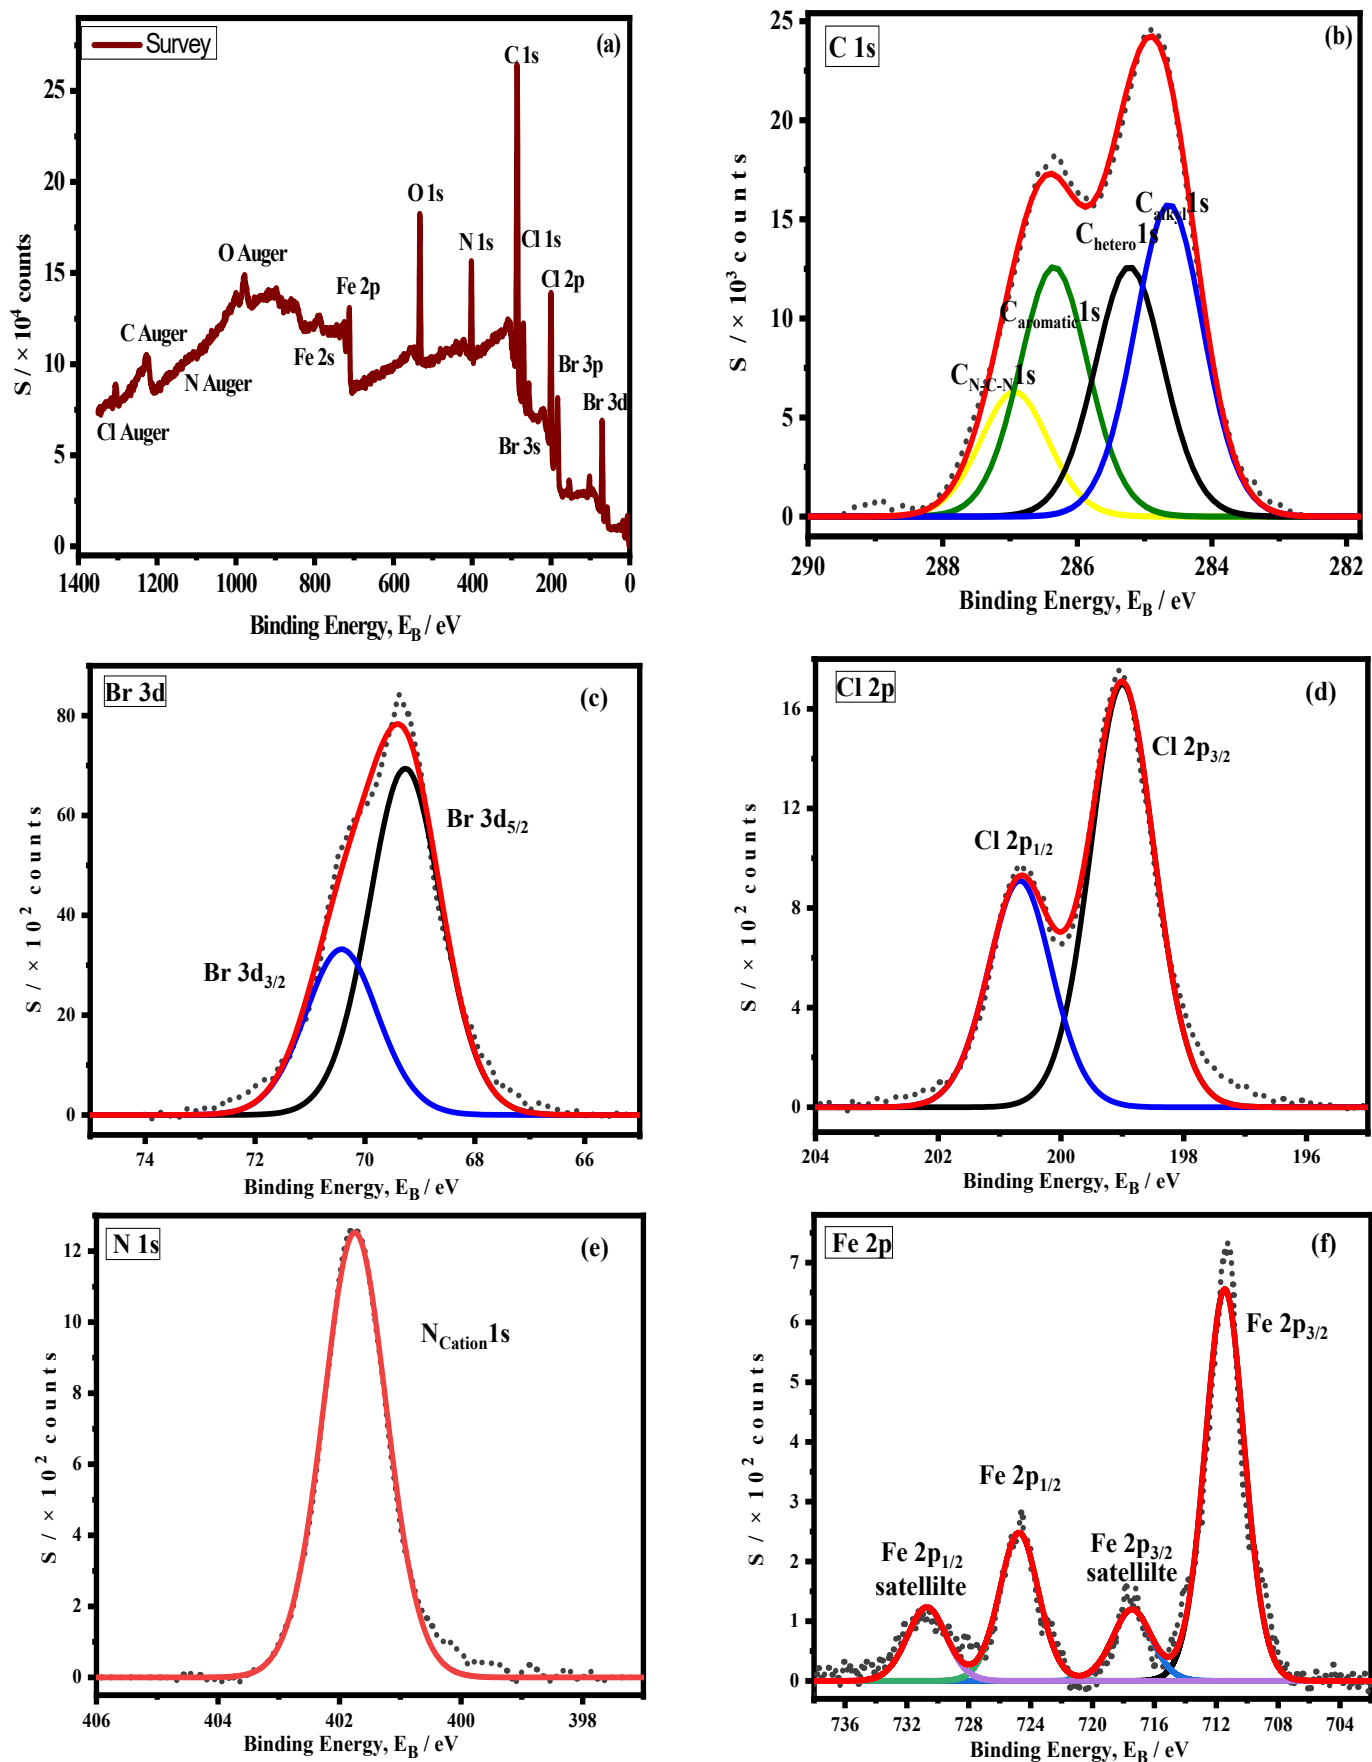

**Fig.S20.** High resolution XPS spectra of (4) showing (a) full survey spectra, (b) peak fitted C 1s with structural assignment, (c) Br 3d, (d) Cl 2p, (e) N 1s and (f) Fe 2p

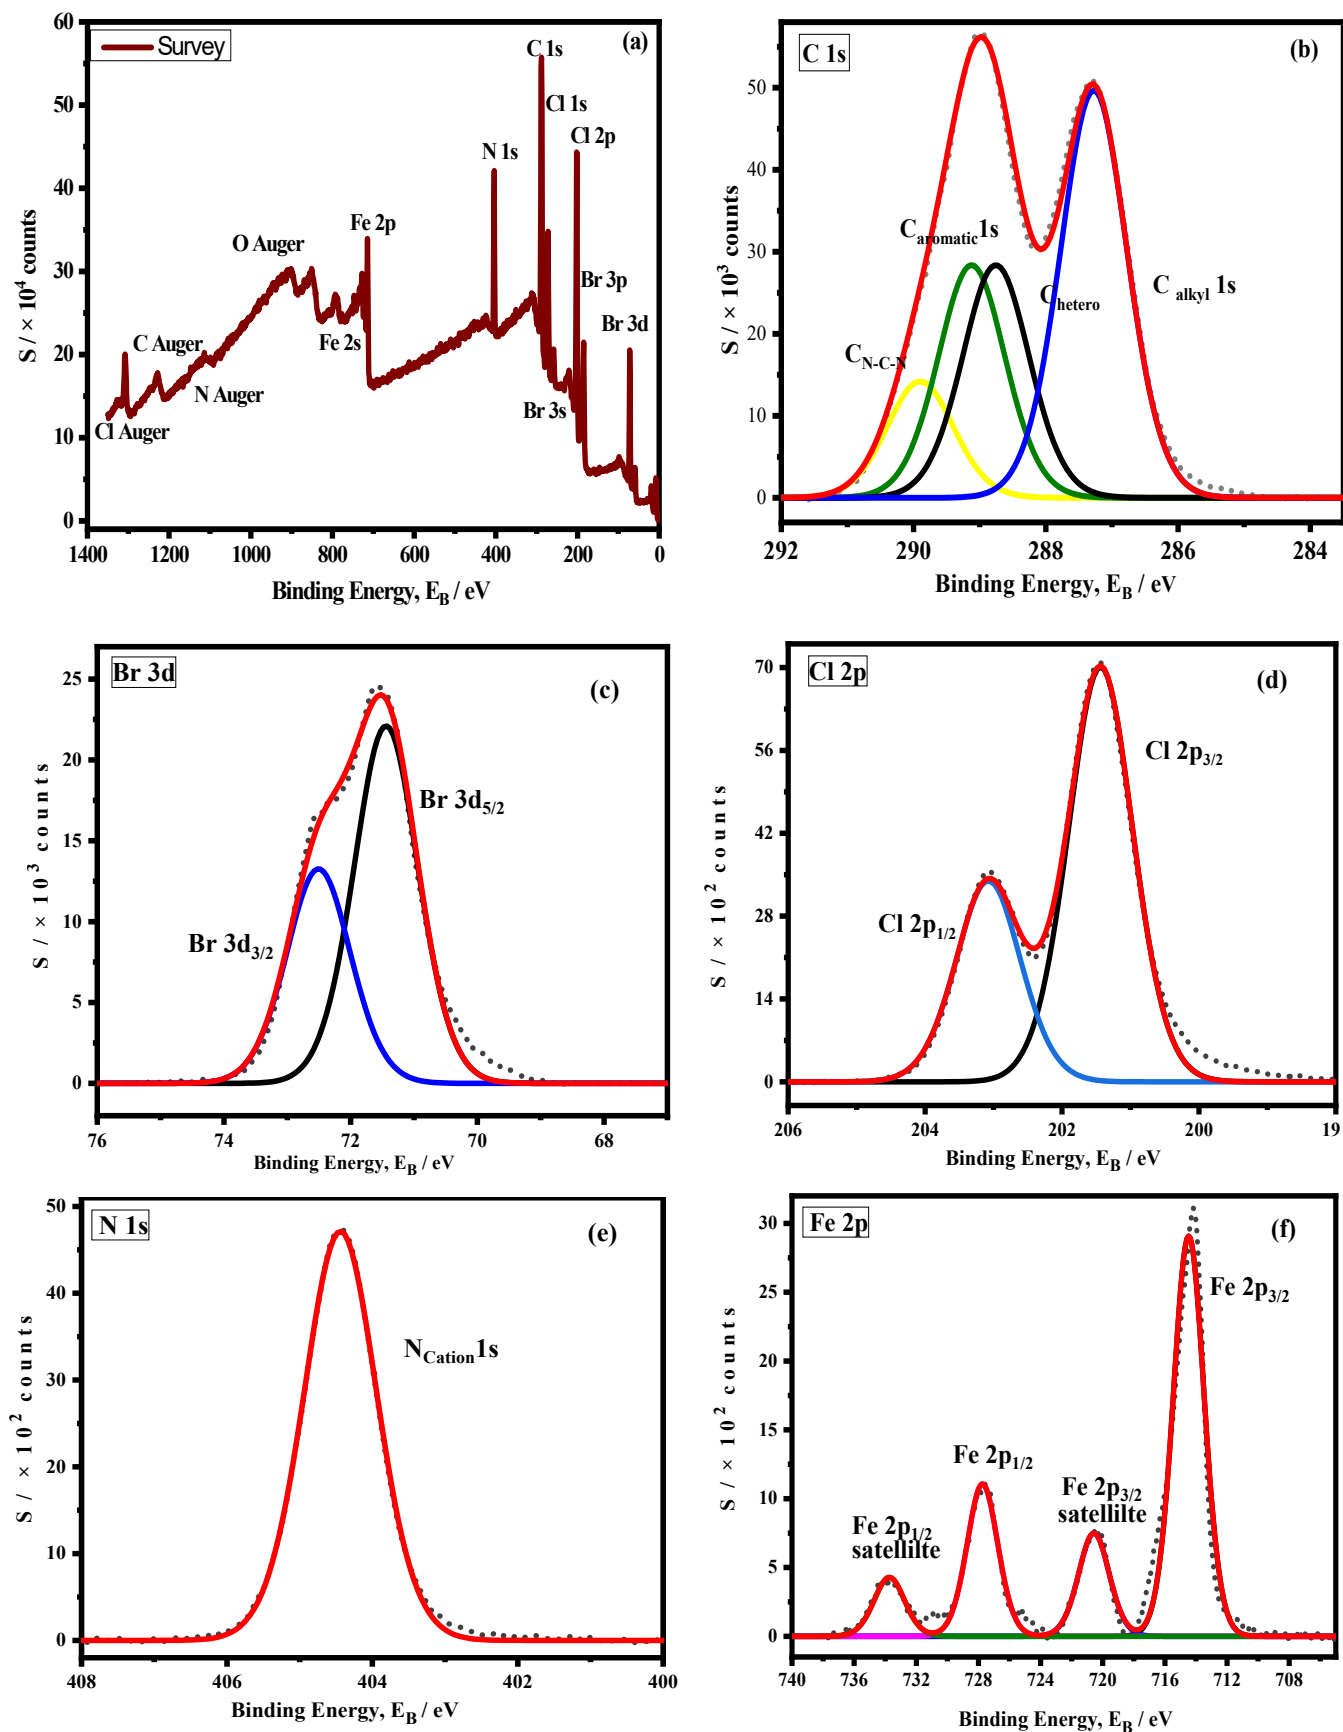

**Fig.S21.** High resolution XPS spectra of (5) showing (a) full survey spectra, (b) peak fitted C 1s with structural assignment, (c) Br 3d, (d) Cl 2p, (e) N 1s and (f) Fe 2p
